1 **Title:** Shannon Entropy as a metric for conditional gene expression in *Neurospora crassa*

2

3 **Authors:** Abigail J. Ameri<sup>1</sup> and Zachary A. Lewis<sup>1,2</sup>

4

5 **Institutional Affiliations:**

6 <sup>1</sup> Department of Microbiology, University of Georgia, Athens, GA, 30602

7 <sup>2</sup> Corresponding Author: Zachary A. Lewis, University of Georgia, Athens, GA [zlewis@uga.edu](mailto:zlewis@uga.edu)

8

9 ORCID

10 Abigail Ameri: <https://orcid.org/0000-0001-5319-2630>

11 Zachary Lewis: <https://orcid.org/0000-0002-1735-8266>

12

13

14

15

16

17

18

19

20

21

22

23

24

25 **Short Title:** A metric for variable gene expression

26 **Key words or phrases:** Shannon entropy, R, conditional gene expression, *Neurospora*

27 **Corresponding Author:** Zachary A. Lewis, University of Georgia, Athens, GA [zlewis@uga.edu](mailto:zlewis@uga.edu)

28

29

30

31

32

33

34

35

36

37

38

39

40

41

42

43

44

45

46

47 **Abstract**

48 *Neurospora crassa* has been an important model organism for molecular biology and  
49 genetics for over 60 years. *N. crassa* has a complex life cycle, with over 28 distinct cell types and  
50 is capable of transcriptional responses to many environmental conditions including nutrient  
51 availability, temperature, and light. To quantify variation in *N. crassa* gene expression, we  
52 analyzed public expression data from 97 conditions and calculated the Shannon Entropy value  
53 for *Neurospora's* approximately 11,000 genes. Entropy values can be used to estimate the  
54 variability in expression for a single gene over a range of conditions and be used to classify  
55 individual genes as constitutive or condition-specific. Shannon entropy has previously been  
56 used measure the degree of tissue specificity of multicellular plant or animal genes. We use this  
57 metric here to measure variable gene expression in a microbe and provide this information as a  
58 resource for the *N. crassa* research community. Finally, we demonstrate the utility of this  
59 approach by using entropy values to identify genes with constitutive expression across a wide  
60 range of conditions and to identify genes that are activated exclusively during sexual  
61 development.

62

63

## 64 **Introduction**

65           Across conditions, individual genes can display expression patterns that can range from  
66 conditional to constitutive. When performing Quantitative Reverse Transcription PCR (qRT-PCR)  
67 it is crucial to identify constitutively expressed genes for experimental normalization (HUGGETT  
68 *et al.* 2005). Conversely, highly regulated, condition-specific gene promoters are often used in  
69 molecular biology to drive conditional expression of a gene under investigation (e.g., an  
70 essential gene) or to control expression of reporter genes in certain cell types or environmental  
71 conditions (e.g., a gene encoding a fluorescent protein) (GILES *et al.* 1985; HURLEY *et al.* 2012;  
72 LAMB *et al.* 2013). Moreover, identification of genes that are exclusively expressed during a  
73 condition or cell-type of interest can reveal genes that are functionally important. Such genes  
74 or promoters are often identified by examining gene expression across just a handful of  
75 experimental conditions; however, with the increase in publicly available transcriptomics data it  
76 is possible to quantify variation in gene expression across many conditions for a given organism.

77           In 1963, Claude Shannon laid the basis for information theory, and described the unit  
78 known as Shannon entropy (SHANNON 1997). A simplistic definition of Shannon entropy is that it  
79 describes the amount of information a variable can hold (VAJAPEYAM 2014). In our case, a  
80 variable is a gene, and the information is the collection of expression values from different  
81 conditions. If a gene is classified as having low entropy, then the expression values would be  
82 generally consistent across different conditions or possess a low amount of information.  
83 Instead, if a gene is classified as having high entropy, then the expression of this gene would be  
84 highly variable across different conditions and contain a high amount of information.

85           Since entropy describes information contained in a variable there are a number of uses  
86 for such a metric. Previous studies have used entropy to investigate cell and tissue specific  
87 expression of genes (SCHUG *et al.* 2005), identify potential therapeutic targets (FUHRMAN *et al.*  
88 2000), characterize periodicity in gene expression (LANGMEAD *et al.* 2002), identify cancerous  
89 tissue samples (VAN WIERINGEN AND VAN DER VAART 2011), and make genomic comparisons  
90 (MACHADO 2012). Studies using entropy have been carried out in human cell lines (NATHANIEL D.  
91 HEINTZMAN *et al.* 2009), mouse (SCHUG *et al.* 2005), plants (ZHANG *et al.* 2006), yeast (TIMOTHY R.  
92 LEZON *et al.* 2006), bacteria, phage, and metagenomes (AKHTER *et al.* 2013) but not yet in  
93 filamentous fungi.

94           *Neurospora crassa* has a 43Mb genome encoding approximately ~11,000 genes  
95 (BORKOVICH *et al.* 2004) (add Nature paper). There is a whole genome knock out collection, and  
96 genetic, genomic, and epigenetic studies have been carried out with this organism for more  
97 than 100 years (COLOT *et al.* 2006). Indeed, *N. crassa* has been used as a model organism for  
98 epigenetics, testing fungal enzymes for biomass degradation, and circadian clock studies  
99 (DUNLAP *et al.* 2007; TIAN *et al.* 2009; ARAMAYO AND SELKER 2013). As a resource for *N. crassa*  
100 researchers, we generated an entropy value for most genes in the *N. crassa* genome using  
101 publicly available RNA-seq data, and we validated this approach using previously published lists  
102 of housekeeping or inducible genes. This resource has a number of useful applications for the  
103 *N. crassa* community.

104

105

106 **Methods:**

107 **Public data collection:**

108 Entropy calculations were made for all genes in the *N. crassa* genome using public RNA-  
109 seq data sets (97 conditions from a total of 173 separate sets including replicates; Table S1).

110

111 **Data Analysis:**

112 **Mapping, TPM and entropy calculations:**

113 HiSat2 (version 2.1.0) (KIM *et al.* 2019) was used to map all of the SRA accessions to the  
114 NC12 genome (NCBI assembly: GCA\_000182925.2) using appropriate parameters specific for  
115 paired or single end sequence reads (with parameters `-RNA-strandness RF or R`) to produce  
116 bam files which were then sorted and indexed using SAMtools (version 1.3) (LI *et al.* 2009). If  
117 experiments contain replicates, the replicate bam files were merged together before obtaining  
118 counts with featureCounts from Subread (version 1.6.2) (LIAO *et al.* 2014). FeatureCounts was  
119 used with parameters `-T exon` to generate all counts at the gene level. Counts were imported  
120 into R where we obtained TPM using the function `calculateTPM` from the R package `scater`  
121 (McCARTHY *et al.* 2017). This package takes in feature-level (in our case, gene-level) counts and  
122 gene lengths and outputs the TPM values for each gene. TPM values were then used to  
123 calculate the Shannon entropy using the R package `BioQC` (ZHANG *et al.* 2017). The function  
124 `entropySpecificity` was used to calculate the entropy values for all genes in the genome. To  
125 examine specific genes sets, we converted from NCU accession numbers to gene identifiers  
126 from NCBI Genome Assembly NC12 (GCA\_000182925.2) and plotted the kernel density  
127 estimation with rug plots.

128

129 Data Availability Statement: All supplementary tables have been uploaded to Figshare. Table S1  
130 contains SRA accession numbers, short descriptions, total reads, and mapped reads for each  
131 public data set used. Calculated entropy values for all *N. crassa* genes are listed in Table S2. Lists  
132 of all *N. crassa* genes used to benchmark the entropy values and generate panels in figure 2 and  
133 3 are included in Table S3. Code used to generate the data in this manuscript is available  
134 through github. <https://github.com/aicourtney/entropy>

135

136

## 137 **Results and Discussion:**

138 Shannon entropy values are useful in measuring the amount of variation in expression  
139 levels across different tissues or growth conditions. In order to calculate Shannon entropy  
140 values for all *Neurospora crassa* genes, we first compiled a list of available RNA-seq data sets  
141 present in the NCBI sequence read archive (SRA) (Table S1). We selected datasets that were  
142 generated with the wild type strain Oak Ridge strain background, but we used both mating  
143 types. To calculate accurate entropy values, we needed to gather many observations of gene  
144 expression across different conditions. We searched the SRA database (LEINONEN *et al.* 2011) for  
145 *N. crassa* RNA-sequencing entries that were processed at different developmental stages or  
146 grown under different conditions. In total we gathered 173 accessions, which represent 97  
147 developmental or growth conditions. We then developed a pipeline to generate entropy values  
148 for each gene (Figure 1A). Calculated entropy values are available in Table S2. We first mapped  
149 to the NC12 *N. crassa* genome using HiSat2 (KIM *et al.* 2019) to generate bam files. The bam

150 files were then used to generate read counts for each gene in each condition using  
151 featureCounts (LIAO *et al.* 2014), which assigns reads to genomic features. Once the count file  
152 was created, we calculated normalized expression values using the Transcripts per Million  
153 (TPM) normalization method to create a matrix of normalized expression values for all genes in  
154 all conditions. We then used this expression matrix to calculate the Shannon entropy value for  
155 each gene (ZHANG *et al.* 2017). This generated entropy values for 10,300 out of 10,398 genes.  
156 The remaining 98 genes had 0 read counts in all conditions, so we were unable to calculate  
157 entropy. Our final entropy values range from 0.0506 to 6.599. 70% of the genes in the genome  
158 possess low entropy values between 0.05 and 1 (7,180/10,300) (Figure 1B). These values  
159 include the constitutively expressed genes in the genome. Entropy values above one represent  
160 only 30% of the genome (3,120/10,300), corresponding to genes with more condition-specific  
161 expression patterns.

#### 162 **Validation of entropy as a measure of gene expression variation in *N. crassa*.**

163 In order to determine if entropy values are a reliable predictor of expression variability  
164 in a microbe, we examined the entropy values generated here for published gene sets expected  
165 to be enriched for constitutively expressed genes, or conversely, for gene sets expected to  
166 contain genes with highly condition-specific expression patterns. If entropy value is a reliable  
167 measure of gene expression variation across conditions, housekeeping genes should be  
168 enriched for genes with low entropy values, whereas sets of conditionally-induced genes are  
169 expected to be enriched for high entropy values. Two previous studies identified genes useful  
170 for RT-qPCR controls in *N. crassa*. One of which published a list of 38 genes classified as  
171 “housekeeping genes” based on previously generated microarray and RNA-seq datasets under



172 three different conditions (quinic acid (QA) induction, circadian gene expression profiling, and  
173 light response) (HURLEY *et al.* 2015), and the other study identified four genes by using previous  
174 transcriptomic studies and genes used in related organisms to generate candidates that were  
175 validated by quantitative PCR under different conditions (CUSICK *et al.* 2014) (Table S1). To  
176 visualize the distribution of entropy values in this set of 42 “housekeeping” genes, we plotted a  
177 kernel density estimation (KDE) of entropy values (Figure 2A). The KDE is a smoothed version of  
178 a histogram estimated from the underlying data. As expected, the highest density of data  
179 points in the housekeeping data set is around 0.25 (low entropy) and the density falls sharply  
180 around 0.75 (Figure 2A). Two genes in this set possess entropy values above 1.6 and they  
181 encode an exo-beta-1,3-glucanase and a UDP-glucose dehydrogenase. We plotted a heatmap  
182 depicting TPM values for each gene in each condition with genes ranked by entropy values from  
183 low to high (top to bottom) (Figure 2B). Genes with higher entropy values showed significant  
184 induction of gene expression under certain conditions, whereas genes with low entropy values  
185 displayed consistent expression values across all conditions. In particular, the two genes with  
186 high entropy values showed marked induction under certain conditions. Thus, these data  
187 highlight the value of performing a comprehensive analysis of conditional gene expression  
188 when selecting constitutive control genes.

189 We further validated the use of entropy as a measure for constitutive gene expression  
190 by using the same approach with a published list of genes 2,624 genes involved in transcription  
191 and translation (Table S1), reasoning that genes involved in these essential processes would be  
192 expressed at similar levels in all 93 conditions we investigated. (BENZ *et al.* 2014). The  
193 distribution of entropy values for transcription and translation genes resembles the distribution

194 of entropy values for housekeeping genes where the highest density is concentrated at the low  
195 end of entropy values (Figure 2C). Many of the genes that possess entropy values above 1.6 are  
196 either hypothetical proteins or genes associated with cellular transport or metabolism. We  
197 again examined the TPM values for each gene in this set in a heatmap ranked by entropy from  
198 low to high and again find mostly steady expression across conditions (Figure 2D).

199 We next asked if higher entropy values were associated with conditionally expressed  
200 genes. The highest entropy values imply that a gene must only be expressed under specific  
201 conditions and may only show expression in one or a few of the conditions in the entire RNA-  
202 seq dataset. To confirm that higher entropy values were indeed associated with condition- or  
203 tissue-specific gene expression, we created KDE plots for 513 genes induced by light (Figure 3A  
204 and Table S1) and 3,259 genes that have expression changes during sexual development (Figure  
205 3C and Table S1) (WU *et al.* 2014) (WANG *et al.* 2014). In both cases, there is a shift in  
206 distribution of entropy values toward higher entropy values compared to “housekeeping” or  
207 “transcription and translation” genes. We examined TPM values for each gene in each condition  
208 using a heatmap ranked by entropy values from low to high (top to bottom) and find that a  
209 majority of genes in each gene set show variable expression across conditions, as expected  
210 (Figure 3B, D). Genes that have regulation changes during perithecial (sexual) development also  
211 show a shift to the right, but with retention of more low entropy genes than in the light induced  
212 gene set (Figure 3C). Plotting the TPM values in an entropy ranked heatmap shows that  
213 approximately half of these genes are highly expressed across many conditions and half are  
214 variably expressed, corresponding to genes with lower entropy values in the density plot  
215 (Figure 3D). This implies that half of these genes are not specific to sexual or vegetative cell

216 types even though they show transcriptional changes throughout development (WANG *et al.*  
217 2014).

218 As a final confirmation that entropy can be used as a reliable metric to assess the  
219 variation or lack of variation in gene expression levels across many conditions, we plotted the  
220 expression levels of 100 genes with the highest entropy values and 100 genes with the lowest  
221 entropy values. We took the  $\log_2$  TPM values for all conditions (columns) and plotted them for  
222 each gene in a heatmap that was clustered by gene (row) for both the top and bottom 100  
223 genes. As expected, with the lowest entropy values show mostly uniform expression across all  
224 conditions (Figure 4A), and genes in the high entropy group displayed highly variable and  
225 condition-specific expression (Figure 4B). Together, these data demonstrate that entropy is an  
226 effective tool for measuring variation in gene expression levels in a filamentous fungus.

227 The information and code generated in the course of this study could prove useful in a  
228 number of ways. First, identifying genes that are induced in a certain condition and display a  
229 high entropy value will help identify genes that are condition-specific. In addition, examining  
230 entropy values for individual genes can be a useful approach for finding new inducible  
231 promoters to use for genetic studies. Condition-specific expressed genes are good starting  
232 targets to test for this purpose. The entropy metric determined here can also be used to  
233 confirm constitutive expression of genes chosen as controls for RT-PCR. In examining the  
234 housekeeping genes from previously published studies it is clear that not all will function as  
235 good controls under all conditions, a limitation that was discussed by Hurley and colleagues  
236 (HURLEY *et al.* 2015). We combined all of their housekeeping genes together, whereas they had  
237 them divided into housekeeping genes usable for different conditions in qRT-PCR (QA

238 induction, light response studies, and circadian experiments). Here we can choose genes that  
239 will work across all conditions (provided the conditions were represented in the initial dataset).  
240 Our approach provides a quantitative metric that can be applied to identify condition-specific  
241 genes, as opposed to investigating individual datasets or using controls from previous studies  
242 which may not perform as expected. In addition, this methodology is scalable; the initial  
243 inclusion of more conditions will only increase the robustness of the metric produced. As more  
244 data are published, more datasets can be incorporated. This approach can be used across other  
245 fungi in addition to *N. crassa*, provided there are sufficient RNA-seq data publicly available.

246 **Acknowledgments:** We would like to thank Dr. Shannon Quinn for meaningful discussions and  
247 insight on this project, and Dr. Kristina Smith for comments on the manuscript. This work was  
248 supported by grants from the National Institutes of Health (NIH) (R01GM132644) to Z.A.L. and  
249 the National Science Foundation Graduate Research Fellowship Program Grant (DGE-1443117)  
250 to A.J.C.

251

## 252 **References**

- 253 Akhter, S., B. A. Bailey, P. Salamon, R. K. Aziz and R. A. Edwards, 2013 Applying Shannon's  
254 information theory to bacterial and phage genomes and metagenomes. *Sci Rep* 3: 1033.  
255 Aramayo, R., and E. U. Selker, 2013 *Neurospora crassa*, a model system for epigenetics  
256 research. *Cold Spring Harb Perspect Biol* 5: a017921.  
257 Benz, J. P., B. H. Chau, D. Zheng, S. Bauer, N. L. Glass *et al.*, 2014 A comparative systems analysis  
258 of polysaccharide-elicited responses in *Neurospora crassa* reveals carbon source-specific  
259 cellular adaptations. *Mol Microbiol* 91: 275-299.  
260 Borkovich, K. A., L. A. Alex, O. Yarden, M. Freitag, G. E. Turner *et al.*, 2004 Lessons from the  
261 genome sequence of *Neurospora crassa*: tracing the path from genomic blueprint to  
262 multicellular organism. *Microbiol Mol Biol Rev* 68: 1-108.  
263 Colot, H. V., G. Park, G. E. Turner, C. Ringelberg, C. M. Crew *et al.*, 2006 A high-throughput gene  
264 knockout procedure for *Neurospora* reveals functions for multiple transcription factors.  
265 *Proc Natl Acad Sci U S A* 103: 10352-10357.

- 266 Cusick, K. D., L. A. Fitzgerald, R. K. Pirlo, A. L. Cockrell, E. R. Petersen *et al.*, 2014 Selection and  
267 evaluation of reference genes for expression studies with quantitative PCR in the model  
268 fungus *Neurospora crassa* under different environmental conditions in continuous  
269 culture. *PLoS One* 9: e112706.
- 270 Dunlap, J. C., J. J. Loros, H. V. Colot, A. Mehra, W. J. Belden *et al.*, 2007 A circadian clock in  
271 *Neurospora*: how genes and proteins cooperate to produce a sustained, entrainable,  
272 and compensated biological oscillator with a period of about a day. *Cold Spring Harb*  
273 *Symp Quant Biol* 72: 57-68.
- 274 Fuhrman, S., M. J. Cunningham, X. Wen, G. Zweiger, J. J. Seilhamer *et al.*, 2000 The application  
275 of shannon entropy in the identification of putative drug targets. *Biosystems* 55: 5-14.
- 276 Giles, N. H., M. E. Case, J. Baum, R. Geever, L. Huiet *et al.*, 1985 Gene organization and  
277 regulation in the qa (quinic acid) gene cluster of *Neurospora crassa*. *Microbiol Rev* 49:  
278 338-358.
- 279 Huggett, J., K. Dheda, S. Bustin and A. Zumla, 2005 Real-time RT-PCR normalisation; strategies  
280 and considerations. *Genes Immun* 6: 279-284.
- 281 Hurley, J. H., A. Dasgupta, P. Andrews, A. M. Crowell, C. Ringelberg *et al.*, 2015 A Tool Set for  
282 the Genome-Wide Analysis of *Neurospora crassa* by RT-PCR. *G3 (Bethesda)* 5: 2043-  
283 2049.
- 284 Hurley, J. M., C. H. Chen, J. J. Loros and J. C. Dunlap, 2012 Light-inducible system for tunable  
285 protein expression in *Neurospora crassa*. *G3 (Bethesda)* 2: 1207-1212.
- 286 Kim, D., J. M. Paggi, C. Park, C. Bennett and S. L. Salzberg, 2019 Graph-based genome alignment  
287 and genotyping with HISAT2 and HISAT-genotype. *Nat Biotechnol* 37: 907-915.
- 288 Lamb, T. M., J. Vickery and D. Bell-Pedersen, 2013 Regulation of gene expression in *Neurospora*  
289 *crassa* with a copper responsive promoter. *G3 (Bethesda)* 3: 2273-2280.
- 290 Langmead, C. J., C. R. McClung and B. R. Donald, 2002 A maximum entropy algorithm for  
291 rhythmic analysis of genome-wide expression patterns. *Proc IEEE Comput Soc Bioinform*  
292 *Conf* 1: 237-245.
- 293 Leinonen, R., H. Sugawara, M. Shumway and C. International Nucleotide Sequence Database,  
294 2011 The sequence read archive. *Nucleic Acids Res* 39: D19-21.
- 295 Li, H., B. Handsaker, A. Wysoker, T. Fennell, J. Ruan *et al.*, 2009 The Sequence Alignment/Map  
296 format and SAMtools. *Bioinformatics* 25: 2078-2079.
- 297 Liao, Y., G. K. Smyth and W. Shi, 2014 featureCounts: an efficient general purpose program for  
298 assigning sequence reads to genomic features. *Bioinformatics* 30: 923-930.
- 299 Machado, J. A. T., 2012 Shannon Entropy Analysis of the Genome Code. *Mathematical Problems*  
300 *in Engineering* 2012.
- 301 McCarthy, D. J., K. R. Campbell, A. T. L. Lun and Q. F. Wills, 2017 Scater: pre-processing, quality  
302 control, normalization and visualization of single-cell RNA-seq data in R. *Bioinformatics*  
303 33: 1179-1186.
- 304 Nathaniel D. Heintzman, Gary C. Hon, R. David Hawkins, Pouya Kheradpour, Alexander Stark *et*  
305 *al.*, 2009 Histone modifications at human enhancers reflect global cell-type-specific gene  
306 expression. *Nature* 459: 108-112.
- 307 Schug, J., W. P. Schuller, C. Kappen, J. M. Salbaum, M. Bucan *et al.*, 2005 Promoter features  
308 related to tissue specificity as measured by Shannon entropy. *Genome Biol* 6: R33.

- 309 Shannon, C. E., 1997 The mathematical theory of communication. 1963. MD Comput 14: 306-  
310 317.
- 311 Tian, C., W. T. Beeson, A. T. Iavarone, J. Sun, M. A. Marletta *et al.*, 2009 Systems analysis of  
312 plant cell wall degradation by the model filamentous fungus *Neurospora crassa*. Proc  
313 Natl Acad Sci U S A 106: 22157-22162.
- 314 Timothy R. Lezon, Jayanth R. Banavar, Marek Cieplak, Amos Maritan and N. V. Fedoroff, 2006  
315 Using the principle of entropy maximization to infer genetic interaction networks from  
316 gene expression patterns. PNAS 103: 19033-19038.
- 317 Vajapeyam, S., 2014 Understanding Shannon's Entropy metric for Information. arXiv preprint.  
318 van Wieringen, W. N., and A. W. van der Vaart, 2011 Statistical analysis of the cancer cell's  
319 molecular entropy using high-throughput data. Bioinformatics 27: 556-563.
- 320 Wang, Z., F. Lopez-Giraldez, N. Lehr, M. Farre, R. Common *et al.*, 2014 Global gene expression  
321 and focused knockout analysis reveals genes associated with fungal fruiting body  
322 development in *Neurospora crassa*. Eukaryot Cell 13: 154-169.
- 323 Wu, C., F. Yang, K. M. Smith, M. Peterson, R. Dekhang *et al.*, 2014 Genome-wide  
324 characterization of light-regulated genes in *Neurospora crassa*. G3 (Bethesda) 4: 1731-  
325 1745.
- 326 Zhang, J. D., K. Hatje, G. Sturm, C. Broger, M. Ebeling *et al.*, 2017 Detect tissue heterogeneity in  
327 gene expression data with BioQC. BMC Genomics 18: 277.
- 328 Zhang, X., J. Yazaki, A. Sundaresan, S. Cokus, S. W. Chan *et al.*, 2006 Genome-wide high-  
329 resolution mapping and functional analysis of DNA methylation in arabidopsis. Cell 126:  
330 1189-1201.  
331
- 332

333 Figure Legends

334 **Figure 1: Calculation of Shannon entropy for *N. crassa* genes using public RNA-seq data.**

335 A) Schematic of our computational pipeline for calculating Shannon entropy from publically  
336 available datasets.

337 B) *N. crassa* genes display a broad range of entropy values. The histogram shows entropy values  
338 for all genes. The y-axis is the number of genes found in each bin. The x-axis shows the binned  
339 entropy values.

340

341 **Figure 2: Constitutively expressed genes are characterized by low entropy values**

342 A) The relative frequency of entropy values for a list of housekeeping genes is shown as a kernel  
343 density estimation (KDE) plot. The rug plot, black lines on the bottom in the KDE plot represents  
344 the individual data points that create the estimation. The y-axis is the probability density, which  
345 is the probability for each unit (gene) on the x-axis. The total area below the KDE curve  
346 integrates to one.

347 B) The heatmap shows the expression value for housekeeping genes across all conditions  
348 analyzed. The expression level for each gene is plotted as the  $\log_2$  transformed transcript per  
349 million (TPM) value. Genes (rows) are plotted in ranked order based on the entropy value from  
350 low (top) to high (bottom). The scale on the left indicates entropy values for each gene. Each  
351 condition (column) has been assigned a category: Metabolism (gold), Development (green), or  
352 Light Response (blue). The categories are represented at the top of the heatmap in the three  
353 different colors.

354 C) The relative frequency of entropy values for a list of genes related to transcription and  
355 translation is shown as a kernel density estimation (KDE) plot. The rug plot, black lines on the  
356 bottom in the KDE plot represents the individual data points that create the estimation. The y-  
357 axis is the probability density, which is the probability for each unit (gene) on the x-axis.

358 D) Heatmap of  $\log_2$  transformed TPM values from all transcription and translation related genes  
359 (rows) ranked by entropy (low to high). Entropy values are depicted by the brown to green  
360 heatmap on the left, where brown is low (top) and green is high (bottom). Each condition  
361 (column) has been assigned a category: Metabolism (gold), Development (green), or Light  
362 Response (blue). The categories are represented at the top of the heatmap in the three  
363 different colors.

364

365 **Figure 3: Validating entropy values with previously published light induced genes and genes**  
366 **induced during sexual development**

367 A) The relative frequency of entropy values for a list of light induced genes is shown as a kernel  
368 density estimation (KDE) plot. The rug plot, black lines on the bottom in the KDE plot represents  
369 the individual data points that create the estimation. The y-axis is the probability density, which  
370 is the probability for each unit (gene) on the x-axis. The total area below the KDE curve  
371 integrates to one.

372 B) The heatmap shows the expression value for light induced genes across all conditions  
373 analyzed. The expression level for each gene is plotted as the  $\log_2$  transformed TPM value.  
374 Genes (rows) are plotted in ranked order based on the entropy value from low (top) to high  
375 (bottom). The scale on the left indicates entropy values for each gene. Each condition (column)



376 has been assigned a category: Metabolism (gold), Development (green), or Light Response  
377 (blue). The categories are represented at the top of the heatmap in the three different colors.

378 C) The relative frequency of entropy values for a list of sexual development genes is  
379 shown as a kernel density estimation (KDE) plot. The rug plot, black lines on the bottom in the  
380 KDE plot represents the individual data points that create the estimation. The y-axis is the  
381 probability density, which is the probability for each unit (gene) on the x-axis. The total area  
382 below the KDE curve integrates to one.

383 D) The heatmap shows the expression value for sexual development genes across all conditions  
384 analyzed. The expression level for each gene is plotted as the  $\log_2$  transformed TPM value.

385 Genes (rows) are plotted in ranked order based on the entropy value from low (top) to high  
386 (bottom). The scale on the left indicates entropy values for each gene. Each condition (column)  
387 has been assigned a category: Metabolism (gold), Development (green), or Light Response  
388 (blue). The categories are represented at the top of the heatmap in the three different colors.

389

#### 390 **Figure 4: $\log_2$ TPM values for highest and lowest ranked genes**

391 A) The heatmap shows the expression values for the 100 genes with the highest entropy values.

392 The expression level for each gene is plotted as the  $\log_2$  transformed TPM value. Each row  
393 represents a gene. Gene names are listed on the right side of the heatmap. Each condition

394 (column) has been assigned a category: Metabolism (gold), Development (green), or Light  
395 Response (blue). The categories are represented at the top of the heatmap in the three

396 different colors.

397 B) The heatmap shows the expression values for the 100 genes with the lowest entropy values.

398 The expression level for each gene is plotted as the  $\log_2$  transformed TPM value. Each row

399 represents a gene. Gene names are listed on the right side of the heatmap. Each condition

400 (column) has been assigned a category: Metabolism (gold), Development (green), or Light

401 Response (blue). The categories are represented at the top of the heatmap in the three

402 different colors.

403

404

405

*Leahy Javi*

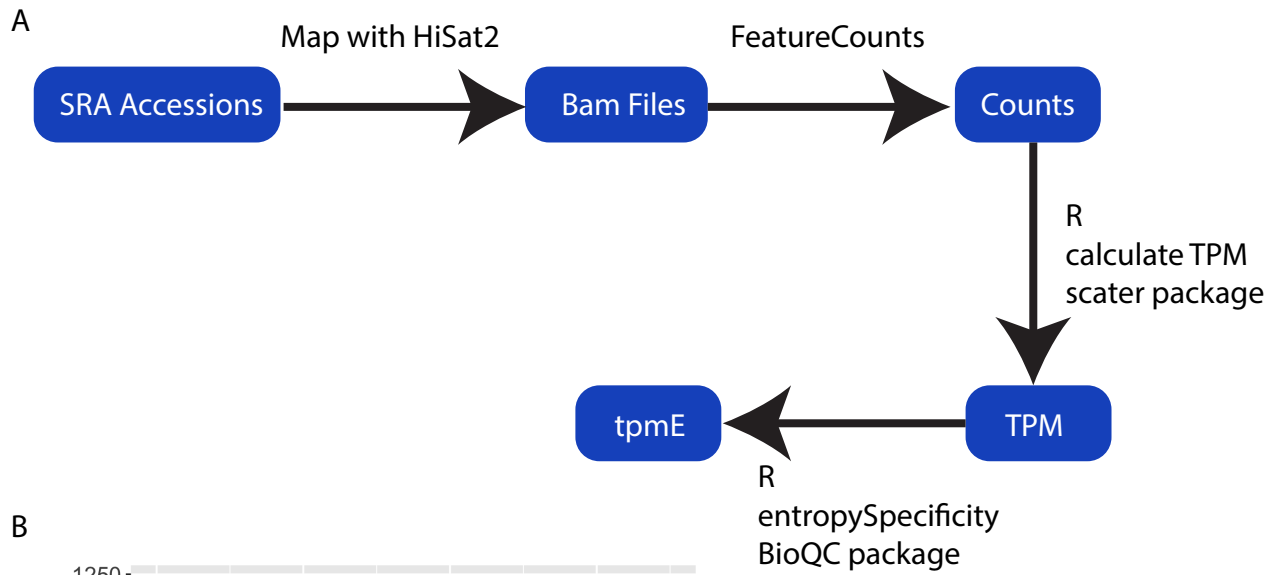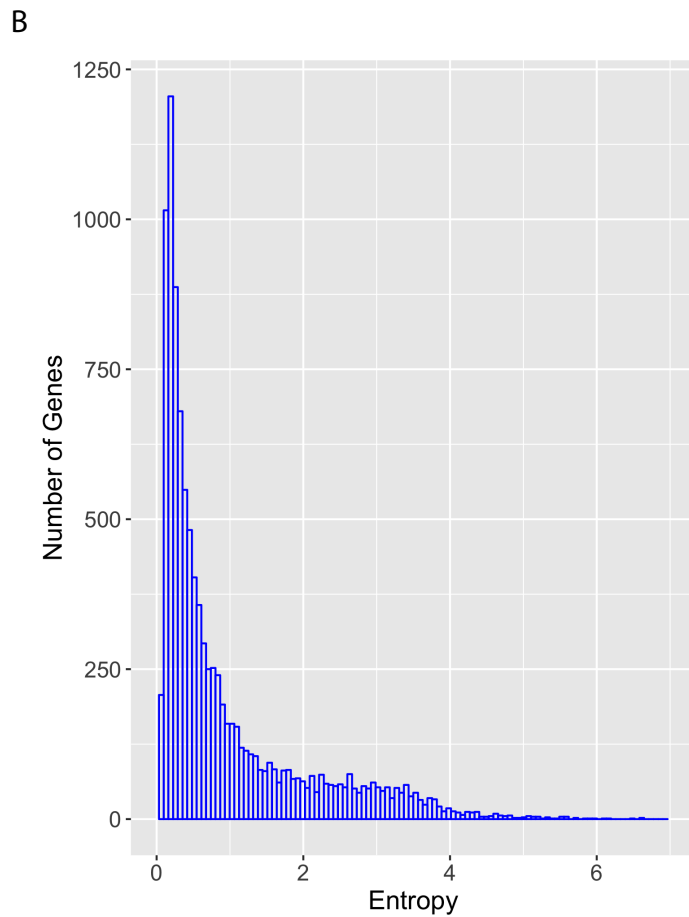

A

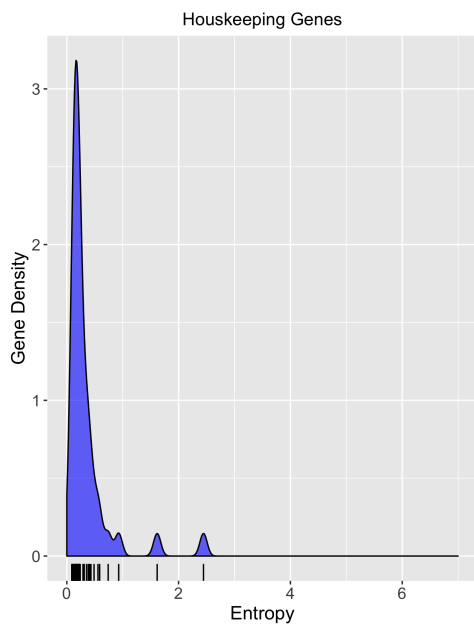

B

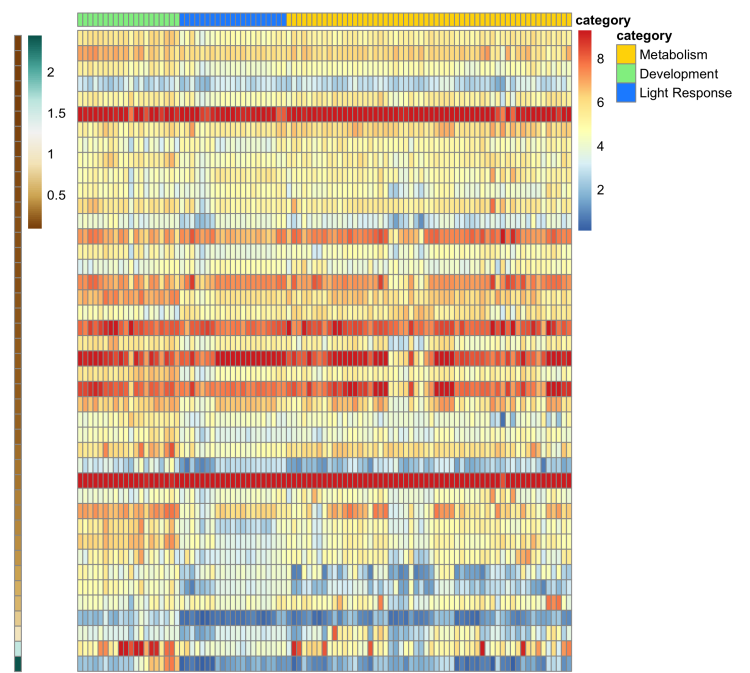

C

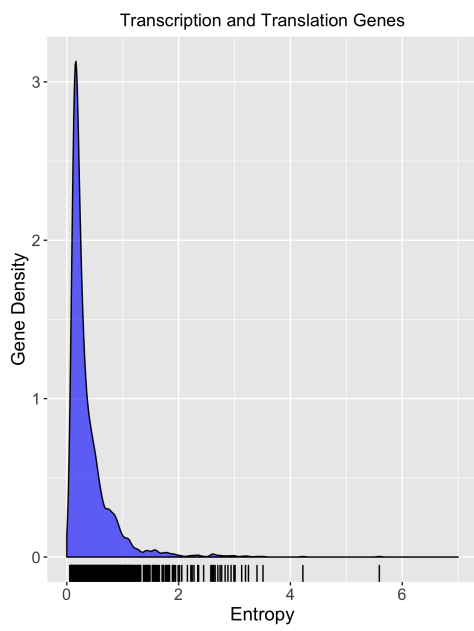

D

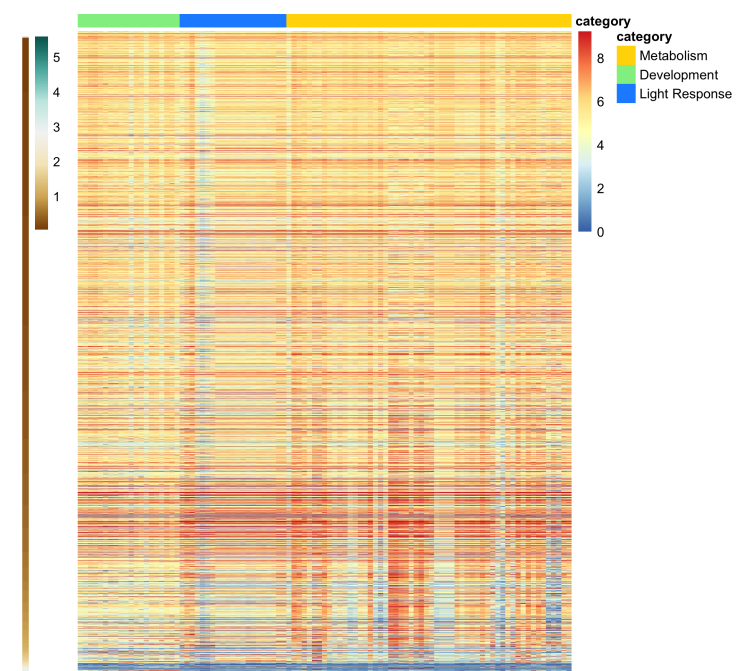

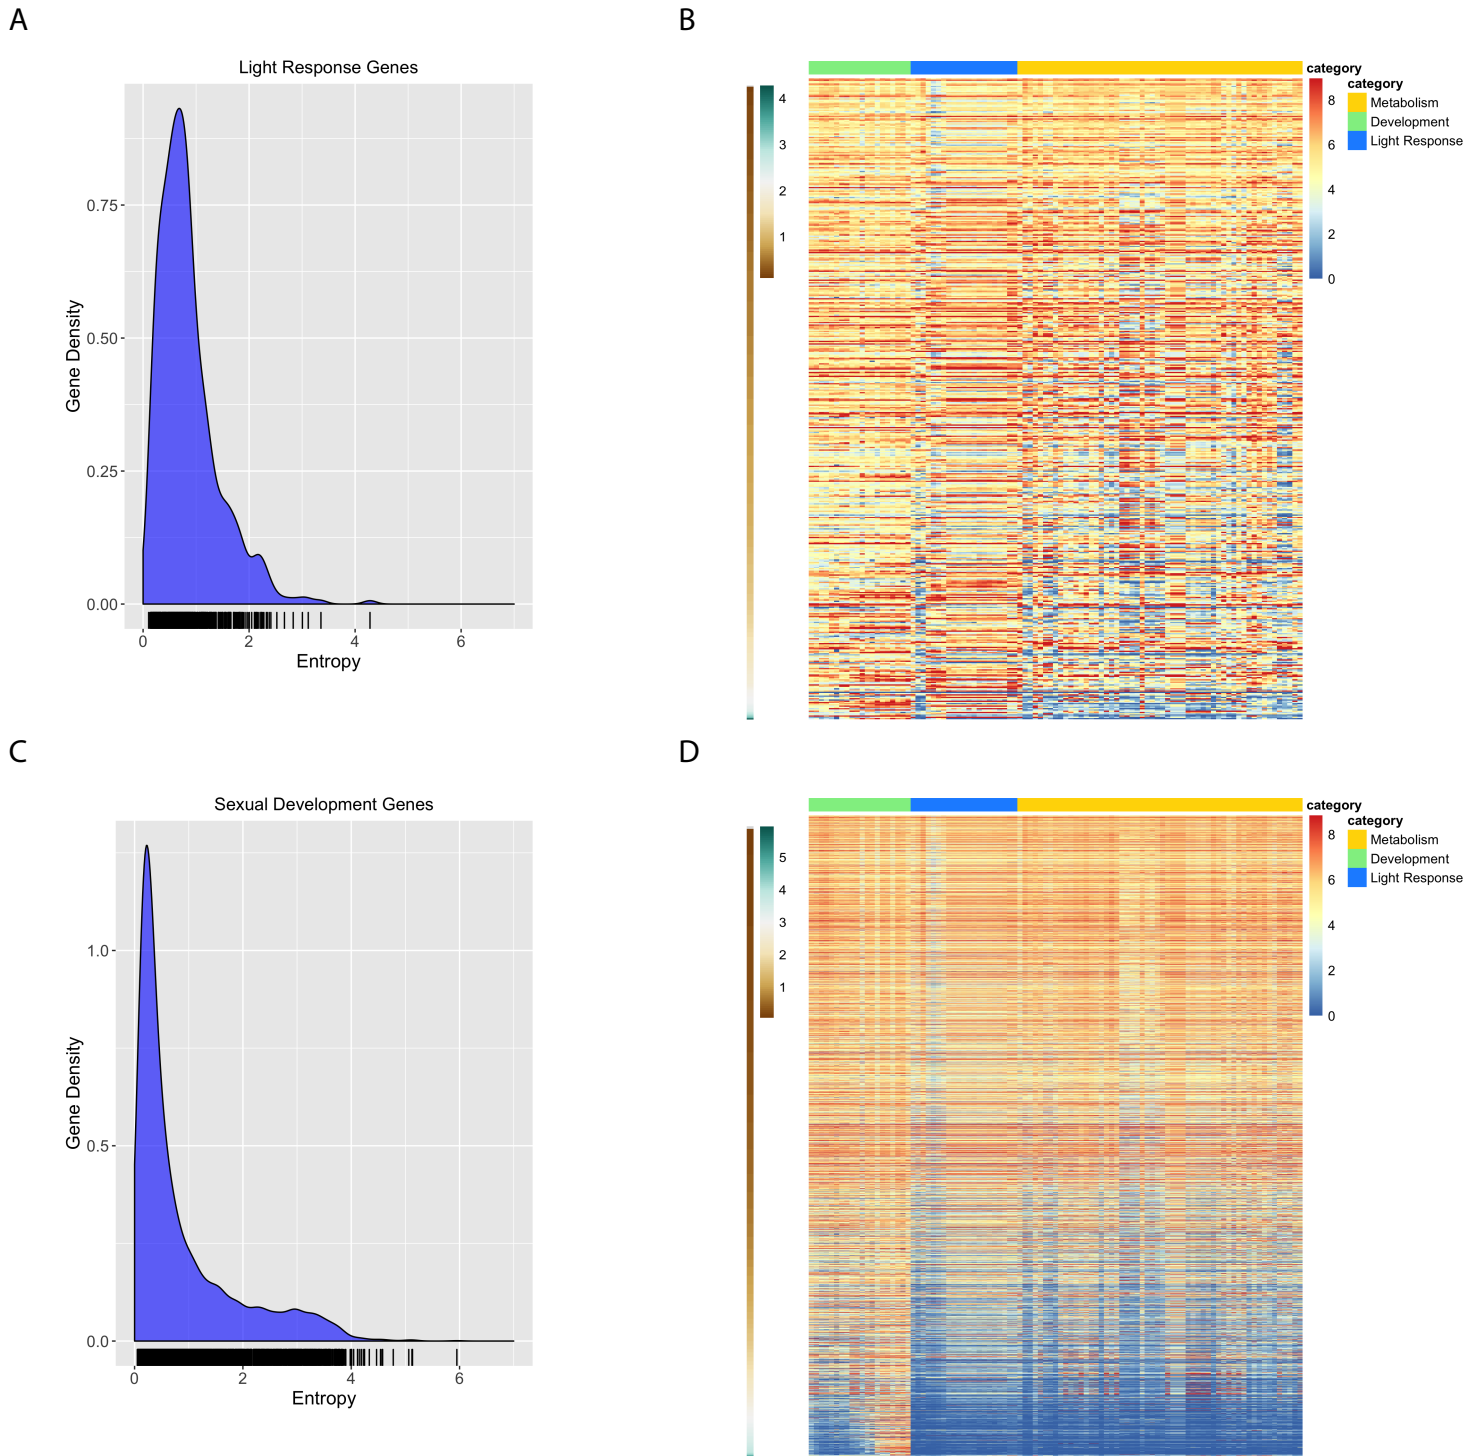

A

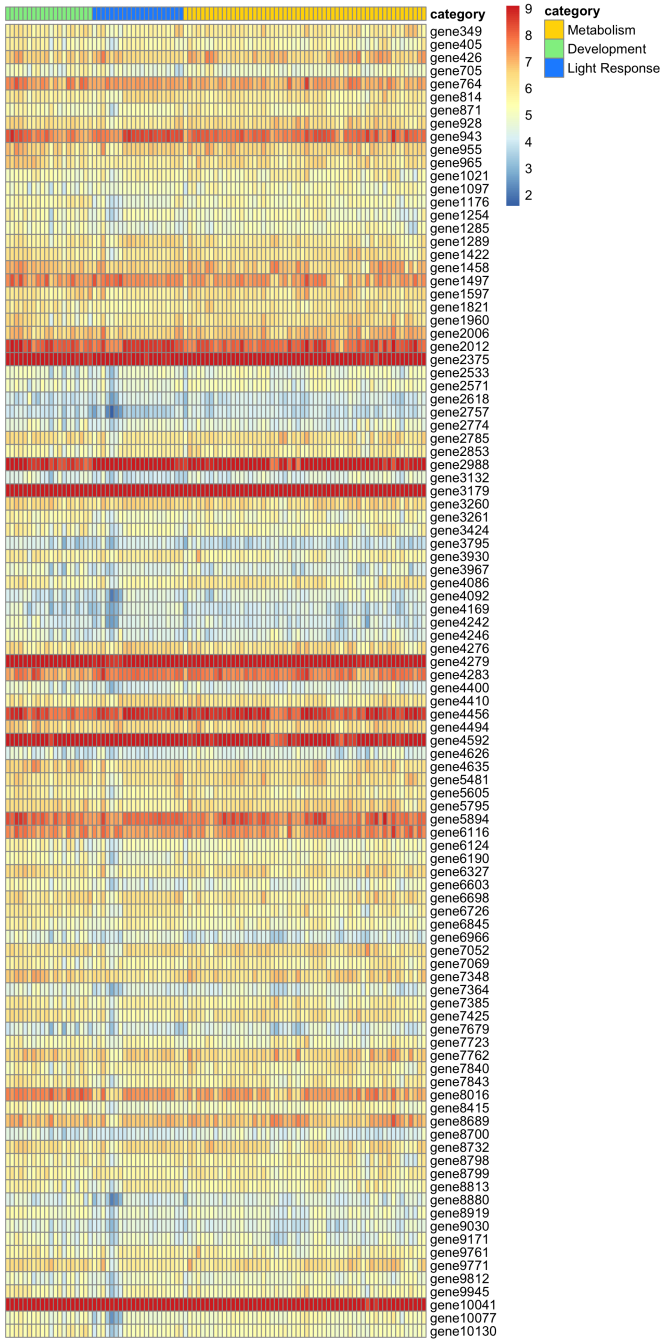

B

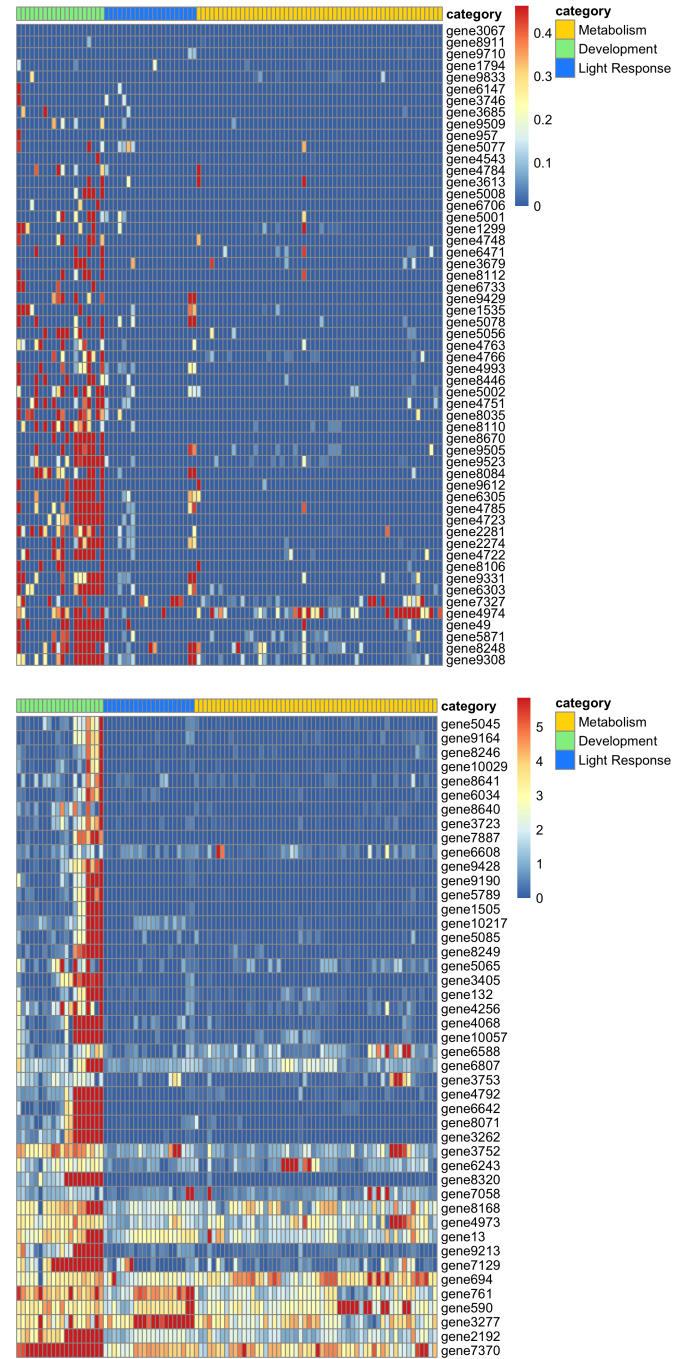

Source: http://biorxiv.org/content/10.1101/2020.10.27.357517v1.full.pdf
